# Supplementary material for: Both Specific Endothelial and Proximal Tubular Adam17 Deletion Protect against Diabetic Nephropathy
Source: MDPI journal article supplement (doi:10.3390/ijms22115520), 2021-05-24
Supplement: s1 [file s1]

Supplementary Figure 1

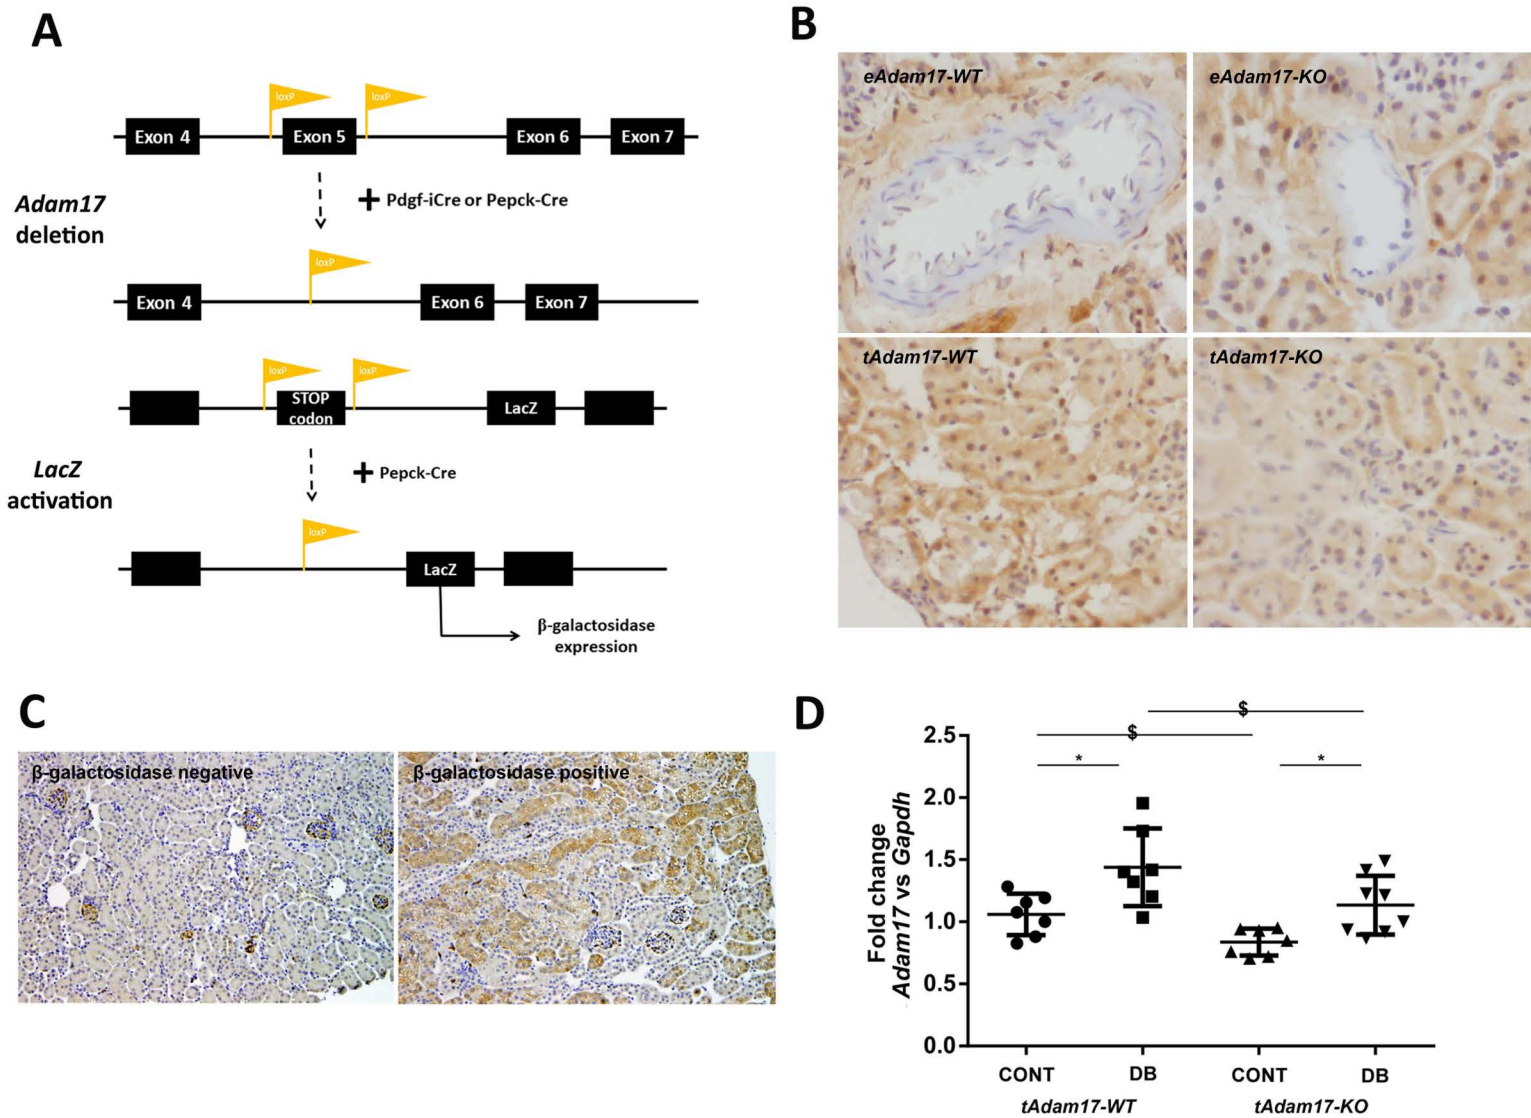

Supplementary Figure 2

**A**

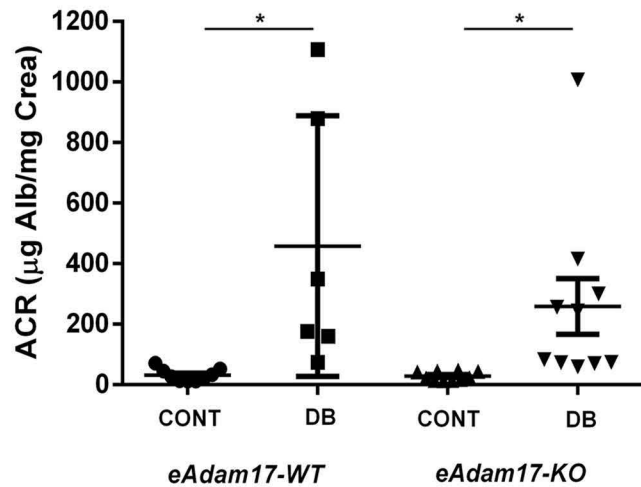

**B**

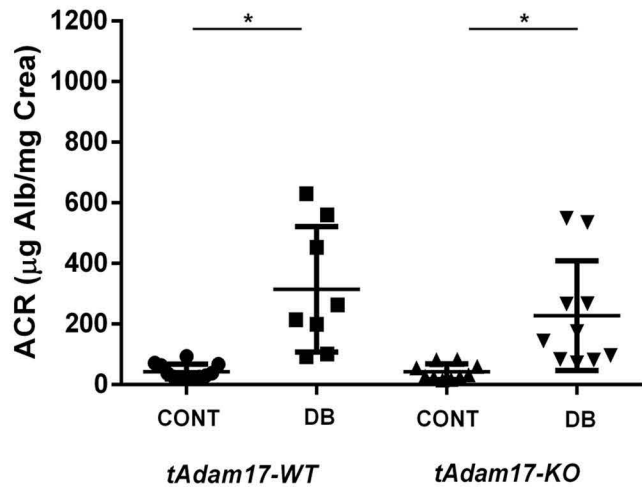

Supplementary Figure 3

**A**

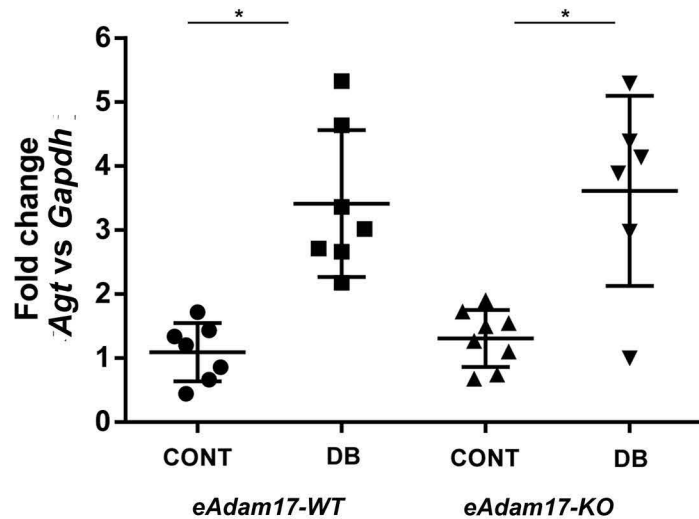

**B**

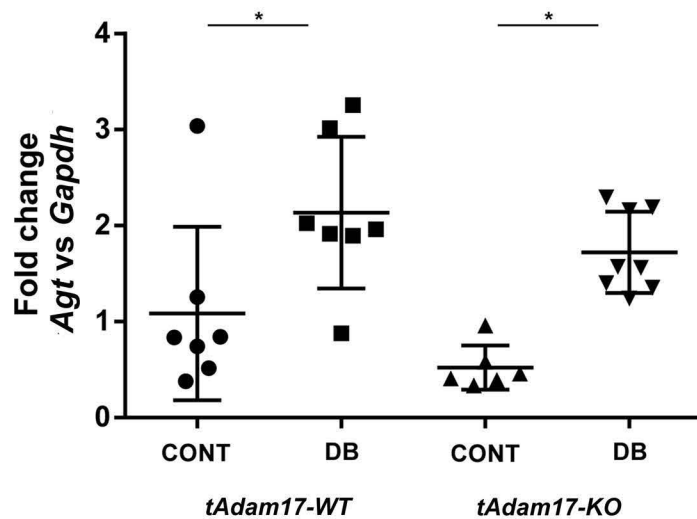

Supplementary Figure 4

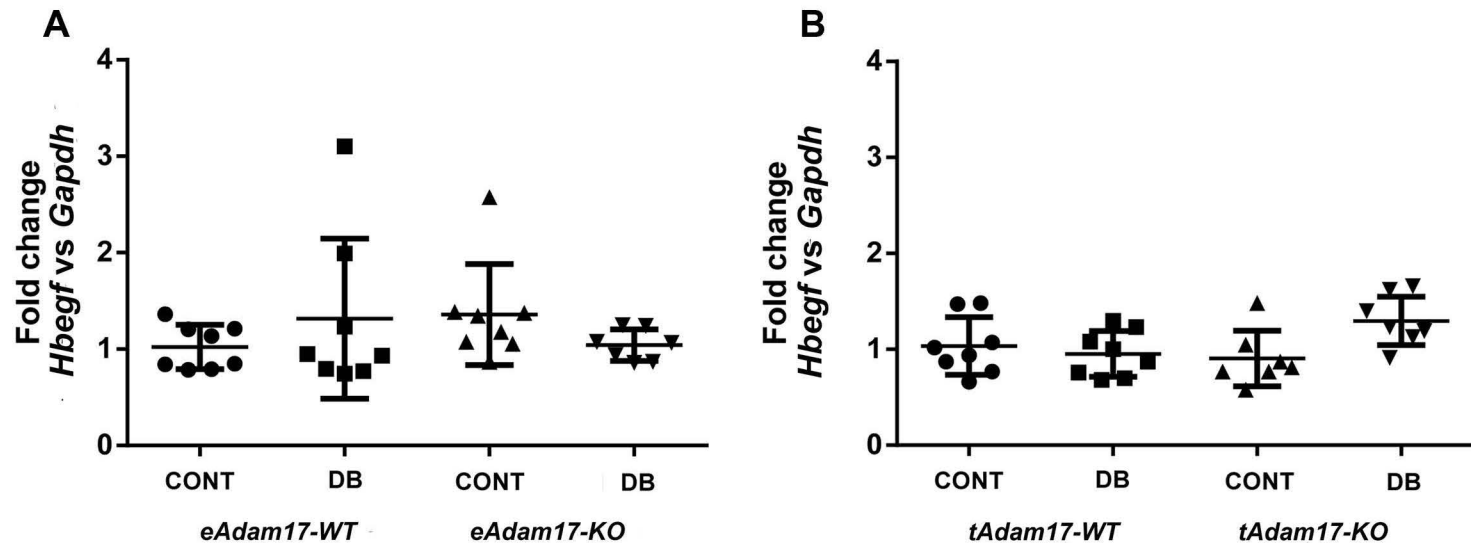

**Supplementary Table 1. Primer sequences used for Real Time qPCR analysis**

|                               | <b>FORWARD</b>                        | <b>REVERSE</b>                    |
|-------------------------------|---------------------------------------|-----------------------------------|
| <b>AT1Ra</b>                  | 5'-CAAAGCTTGCTGGCAATGTA-3'            | 5'-ACTGGTCCTTTGGTCGTGAG-3'        |
| <b>AT2R</b>                   | 5'-TAATCAGCCTAGCCATTGGTTT-3'          | 5'-TGTTCTCGGGGGAGTAAGTAAA-3'      |
| <b>Agt</b>                    | 5'-CGTGCCCCTAGGTGAGAGAG-3'            | 5'-TCCAAGTCAGGAGGTCGTTC-3'        |
| <b>TNF<math>\alpha</math></b> | 5'-GACTAGCCAGGAGGGAGAACAG-3'          | 5'-CAGTGAGTGAAAGGGACAGAACCT-3'    |
| <b>TNFR1</b>                  | 5'-ACGAATCACTCTGCTCCGTG-3'            | 5'-TCGCAAGGTCTGCATTGTCA-3'        |
| <b>FN</b>                     | 5'-GCCACCGGAGTCTTTACTACC-3'           | 5'-TCTCTGTACCTCGGTGTTG-3'         |
| <b>TGF<math>\alpha</math></b> | 5'-AGGAAGAGAAGCCAGCATGT-3'            | 5'-GCAGTGATGGCTTGCTTCTT-3'        |
| <b>HB-EGF</b>                 | 5'-TGGTGGCTGTAGTACTGTCGTC-3'          | 5'-TCATAACCTCCTCTCCTGTGGT-3'      |
| <b>TGF<math>\beta</math></b>  | 5'-CAACAACGCCATCTATGAGAAA-3'          | 5'-CTTCCCGAATGTCTGACGTATT-3'      |
| <b>CCL5</b>                   | 5'-CTGCTGCTTTGCCTACCTCT-3'            | 5'-GTGACAAACACGACTGCAAGAT-3'      |
| <b>GAPDH</b>                  | 5'-TCA TTG ACC TCA ACT ACA TGG TCT-3' | 5'-CTT GAC TGT GCC GTT GAA TTT-3' |
